# Supplementary material
Source: PubMed Central journal article supplement (PMC4010298)

## Supporting Information-NMR Data

# Antineoplastic Agents. 595. Structural Modifications of Betulin and the X-ray Crystal Structure of an Unusual Betulin Amine Dimer.<sup>1a</sup>

*George R. Pettit, \*Noeleen Melody, Frank Hempenstall, Jean-Charles Chapuis, Thomas L.*

*Groy, and Lee Williams<sup>1b</sup>*

Department of Chemistry and Biochemistry, Arizona State University, P.O. Box 871604, Tempe,  
Arizona 85287-1604, United States

S1. <sup>1</sup>H NMR (CDCl<sub>3</sub>, 400 MHz) **11**

S2. <sup>13</sup>C NMR (CDCl<sub>3</sub>, 100 MHz) **11**

S3. <sup>1</sup>H NMR (CDCl<sub>3</sub>, 400 MHz) **12**

S4. <sup>13</sup>C NMR (CDCl<sub>3</sub>, 100 MHz) **12**

S5. <sup>1</sup>H NMR (CDCl<sub>3</sub>, 100 MHz) **17**

S6.  $^{13}\text{C}$  -APT NMR ( $\text{CDCl}_3$ , 100 MHz) **17**

S7.  $^1\text{H}$  NMR ( $\text{CDCl}_3$ , 400 MHz) **25**

S8.  $^{13}\text{C}$  NMR ( $\text{CDCl}_3$ , 100 MHz) **25**

S9.  $^1\text{H}$  NMR ( $\text{CDCl}_3$ , 400 MHz) **26**

S10.  $^{13}\text{C}$  NMR ( $\text{CDCl}_3$ , 100 MHz) **26**

S1.

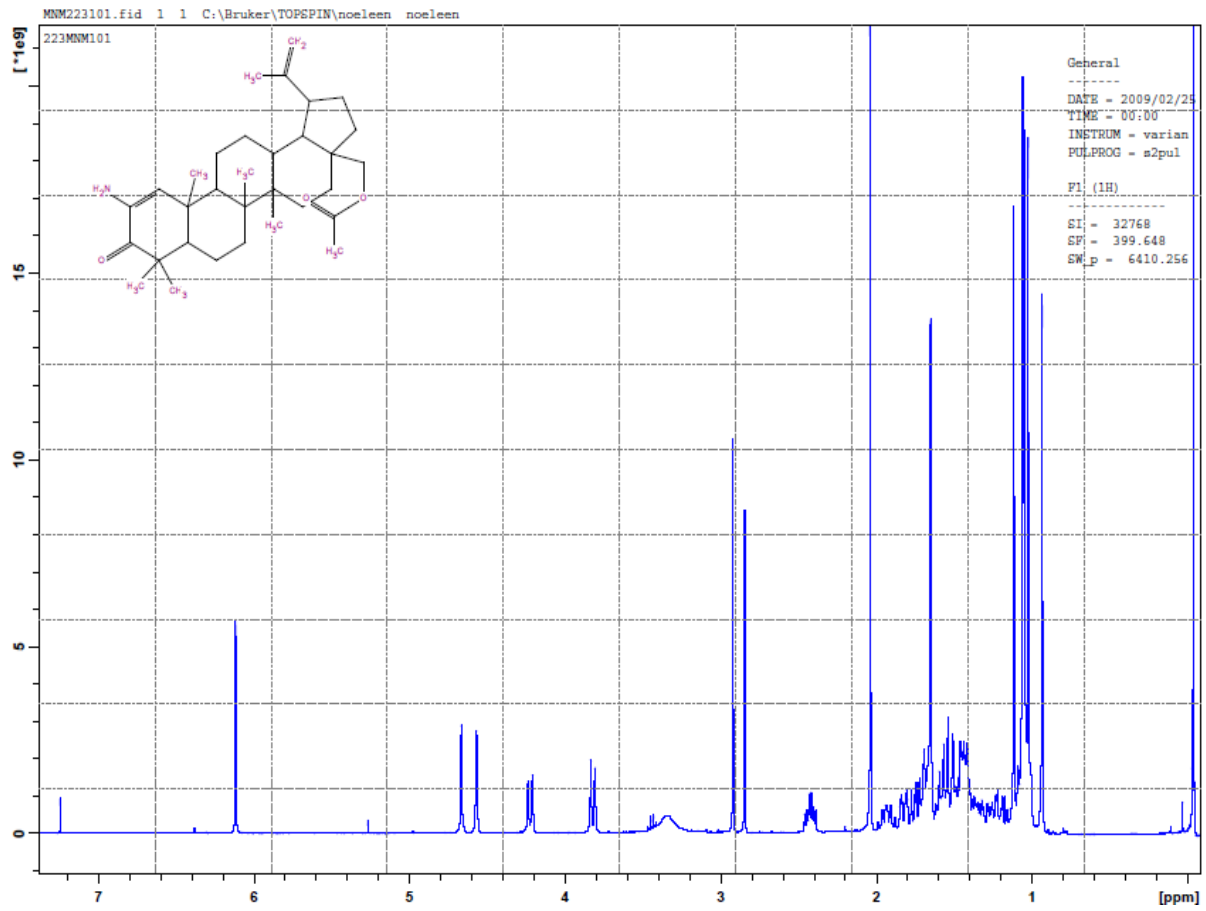



S3.

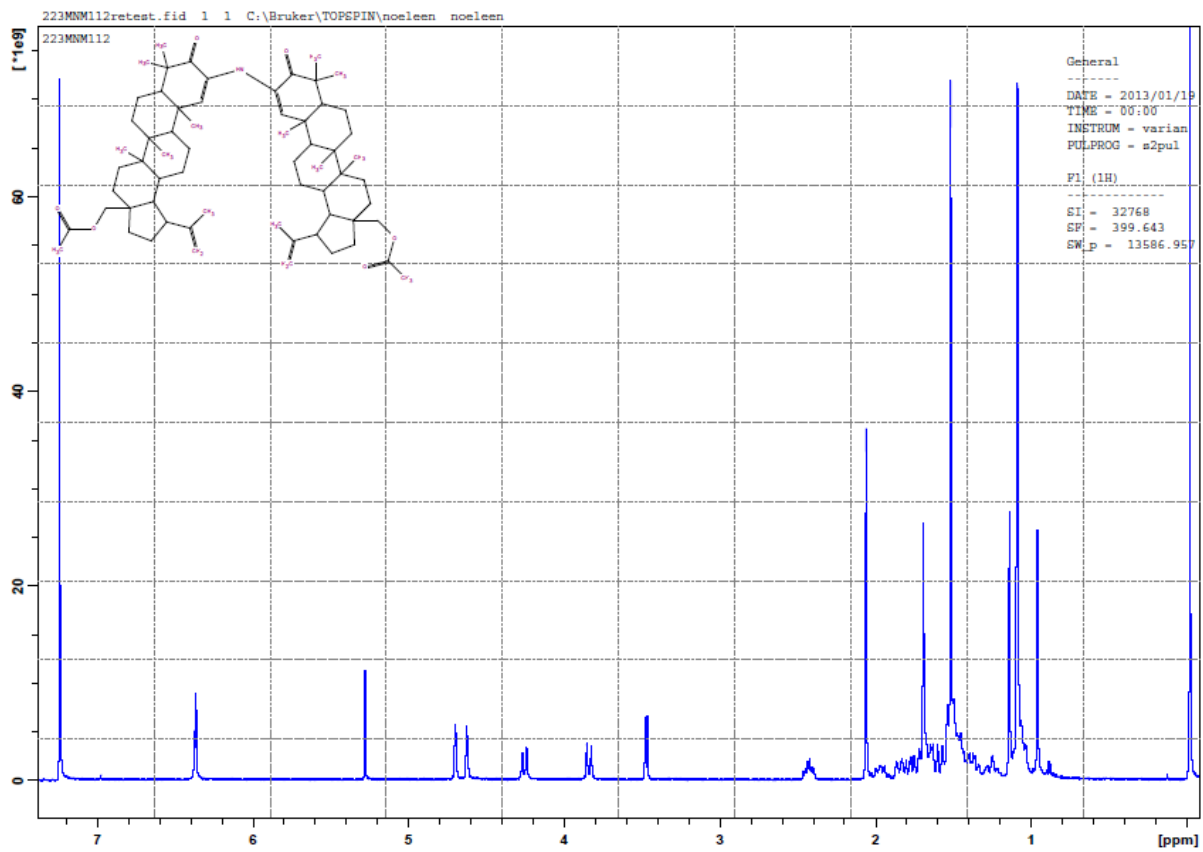

S4.

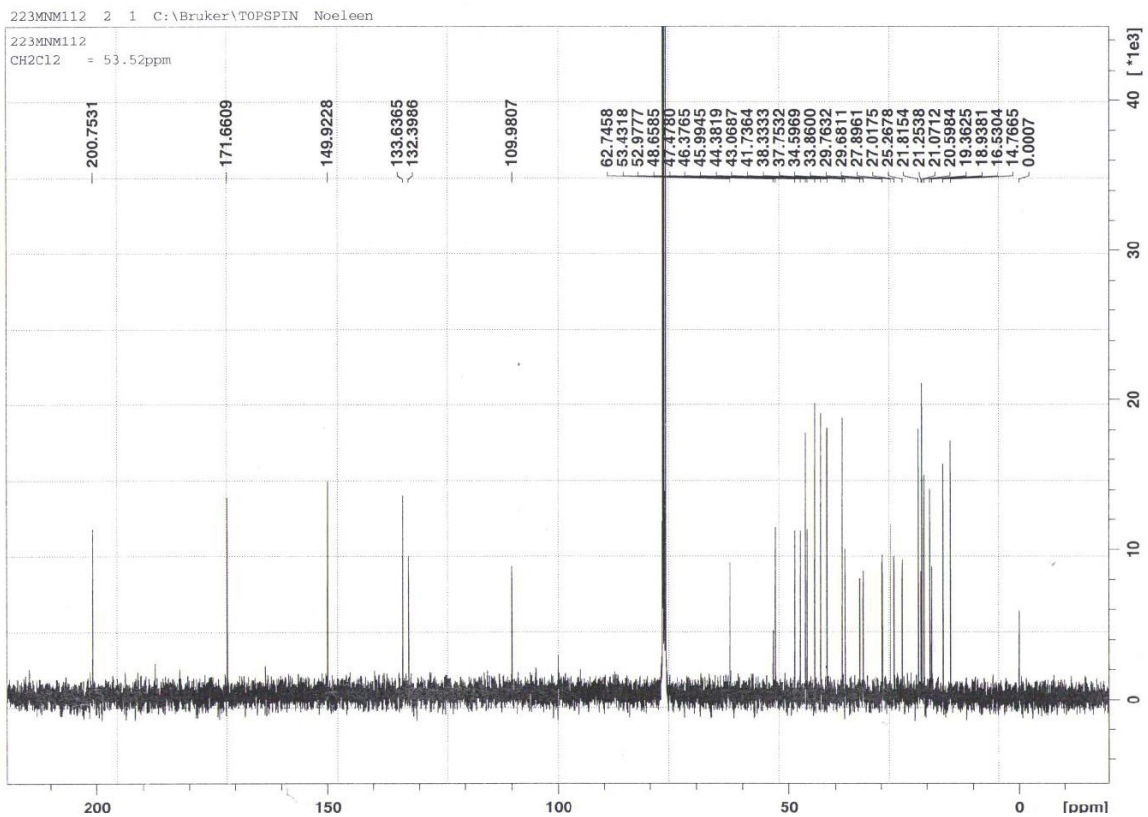

S5.

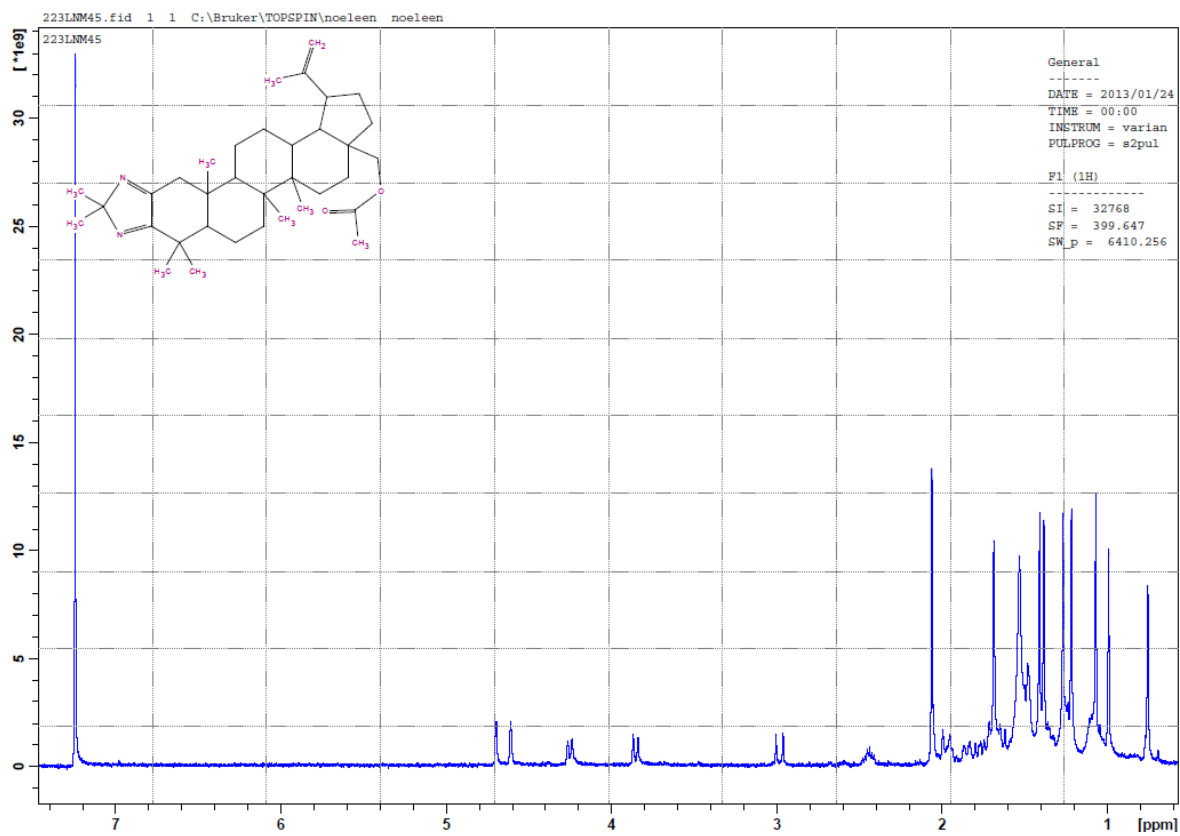

S6.

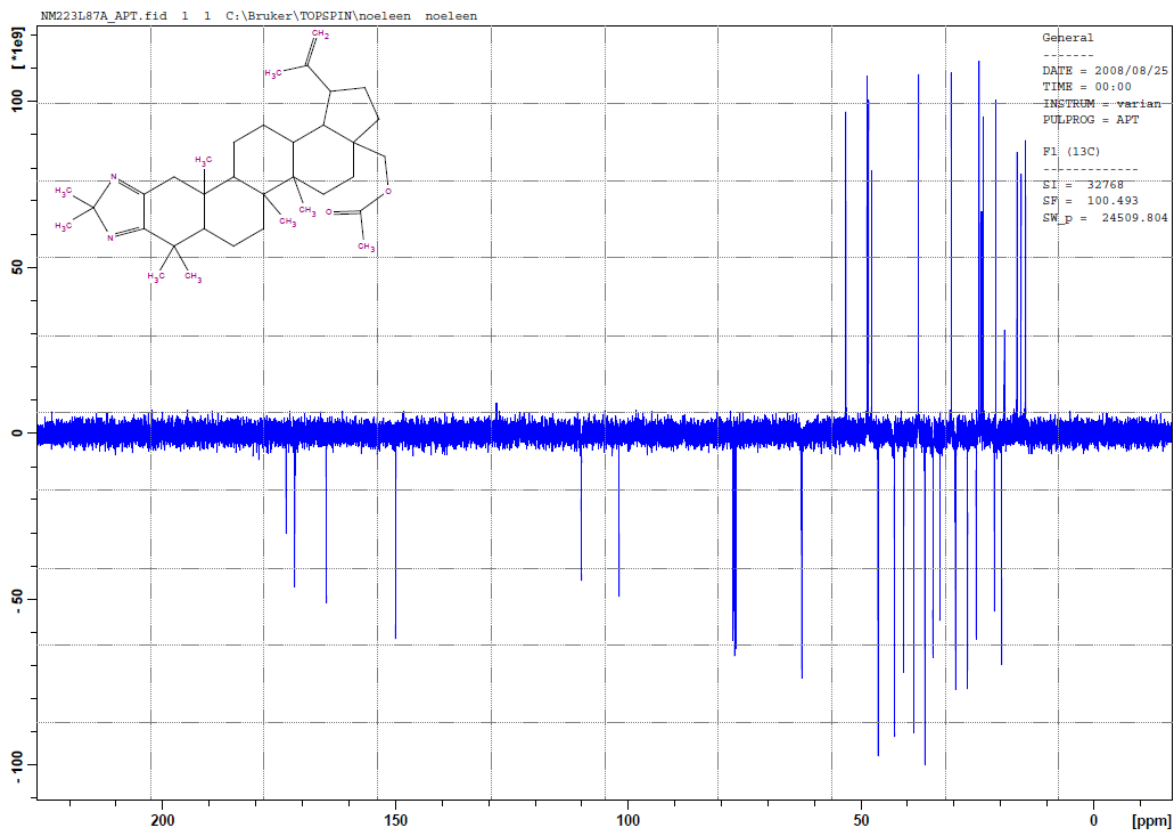



S7.

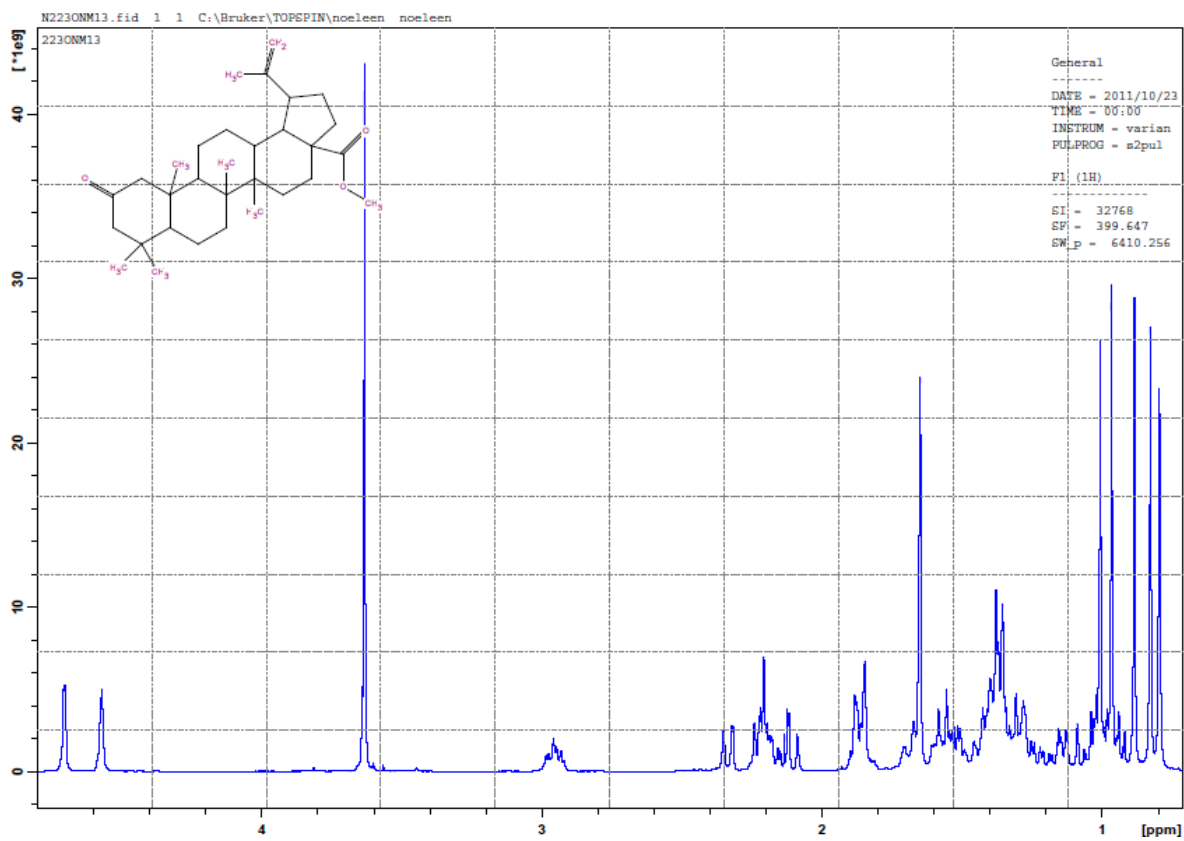

S8.

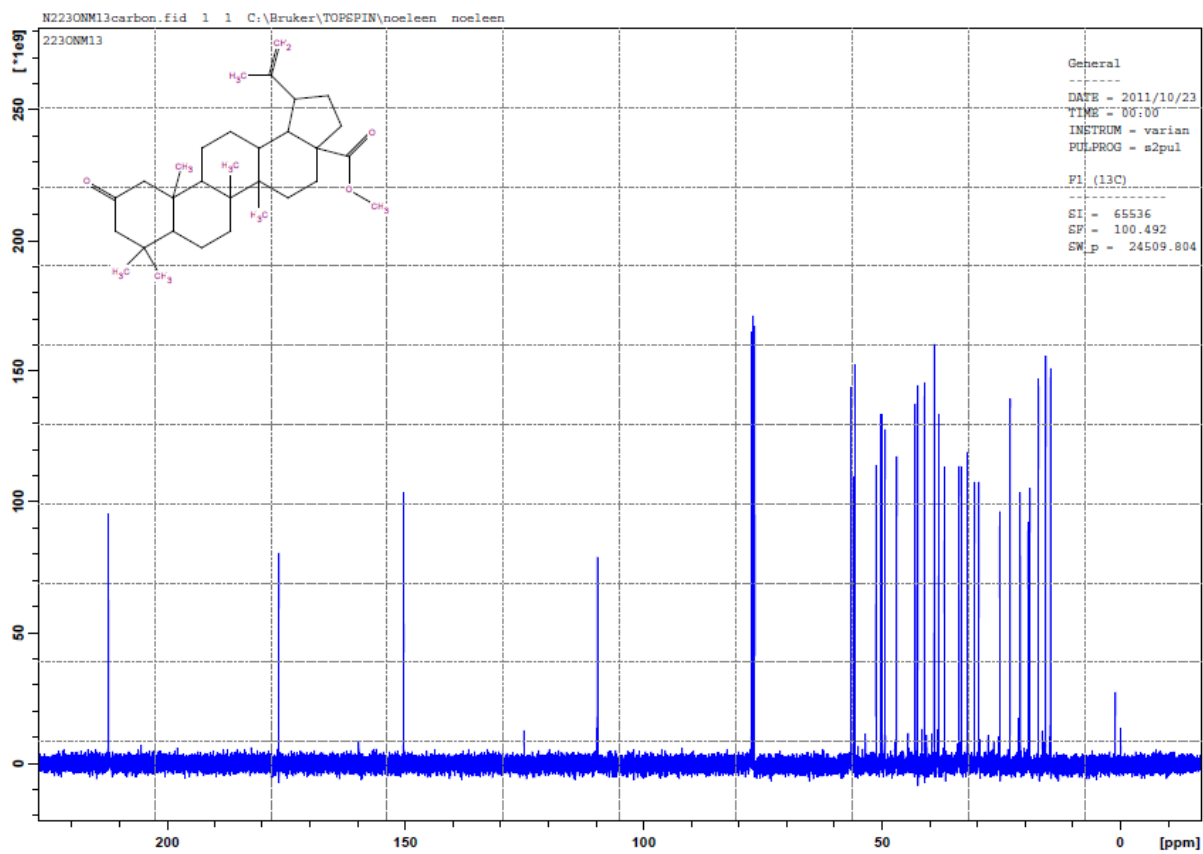

S9.

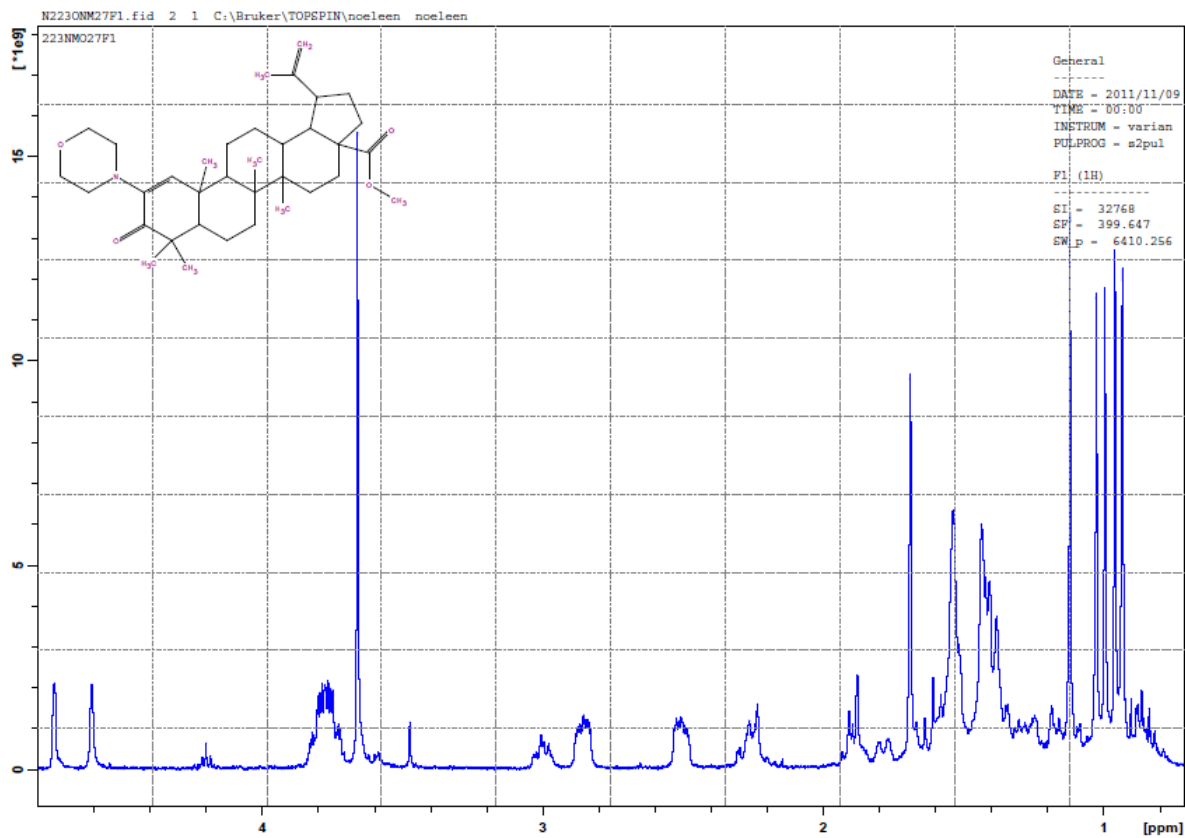

S10.

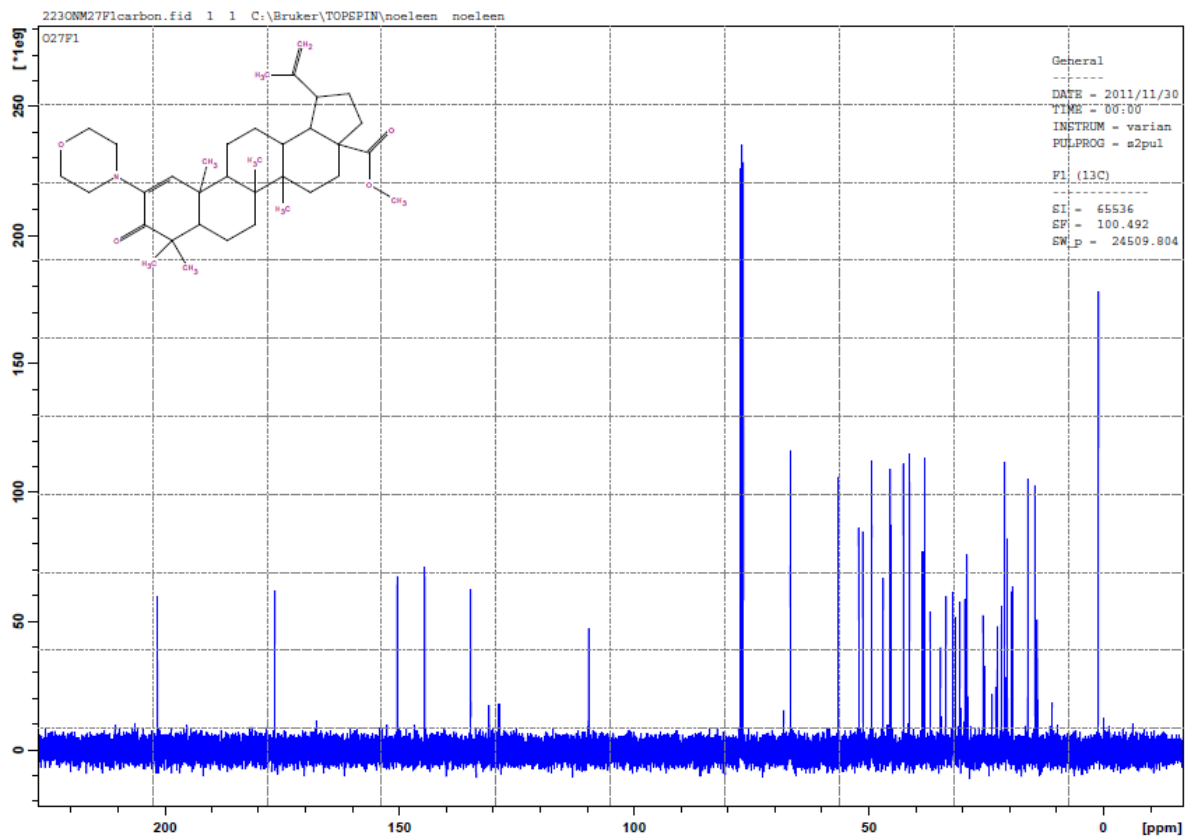

Supplement: np400947d_si_001.pdf [file np400947d_si_001.pdf]
